# Supplementary material for: Theoretical Analysis of the Performance of Glucose Sensors with Layer-by-Layer Assembled Outer Membranes
Source: Sensors (Basel). 2012 Oct 1;12(10):13402–16. doi: 10.3390/s121013402 (PMC3545572; doi:10.3390/s121013402)

## Theoretical Analysis of the Performance of Glucose Sensors with Layer-by-Layer Assembled Outer Membranes

Robert A. Croce Jr.<sup>1</sup>, Santhisagar Vaddiraju<sup>2,3</sup>, Fotios Papadimitrakopoulos<sup>3,4</sup> and Faquir C. Jain<sup>1,\*</sup>

<sup>1</sup> Electrical and Computer Engineering, University of Connecticut, 371 Fairfield Way, Storrs, CT 06269, USA; E-Mail: rjc03001@engr.uconn.edu

<sup>2</sup> Biorasis Inc., Technology Incubation Program, University of Connecticut, Storrs, CT 06268, USA

<sup>3</sup> Nanomaterials Optoelectronics Laboratory, Polymer Program, Institute of Materials Science, University of Connecticut, Storrs, CT 06269, USA; E-Mails: sagar@ims.uconn.edu (S.V.); papadim@ims.uconn.edu (F.P.)

<sup>4</sup> Department of Chemistry, University of Connecticut, Storrs, CT 06269, USA

Figures S1 and S2 show the concentration profiles of glucose and H<sub>2</sub>O<sub>2</sub> for Devices A and B at a GO<sub>x</sub>/PPD thickness of 15 and 25 nm, respectively. For both these GO<sub>x</sub>/PPD thicknesses the concentration of H<sub>2</sub>O<sub>2</sub> is higher in Device B (PSS/PDDA) compared to Device A (HAs/Fe<sup>3+</sup>), similar to that shown in Figure 4. This confirms that tighter (less glucose permeable) outer membranes (Device B) leads to higher build-up of H<sub>2</sub>O<sub>2</sub> within the sensor geometry and the phenomena is independent of the enzyme thickness. Figures 5 and 7 in the manuscript represent the time taken for the sensor to reach 90% of its saturation value. In order to obtain these values, the transient response of the sensor shown in Figures S3 was utilized. These transient responses were obtained utilizing Equation (16).

**Figure S1.** (A) Simulated glucose concentration profile in the multi-layer sensor system consisting of 15 nm GO<sub>x</sub>/PPD as the first layer, and different LBL membranes as the second layer (HAs/Fe<sup>3+</sup> and PSS/PDDA); (B) simulated H<sub>2</sub>O<sub>2</sub> concentration profile in the multi-layer sensor system consisting of 15 nm GO<sub>x</sub>/PPD as the first layer, and different LBL membranes as the second layer (HAs/Fe<sup>3+</sup> and PSS/PDDA).

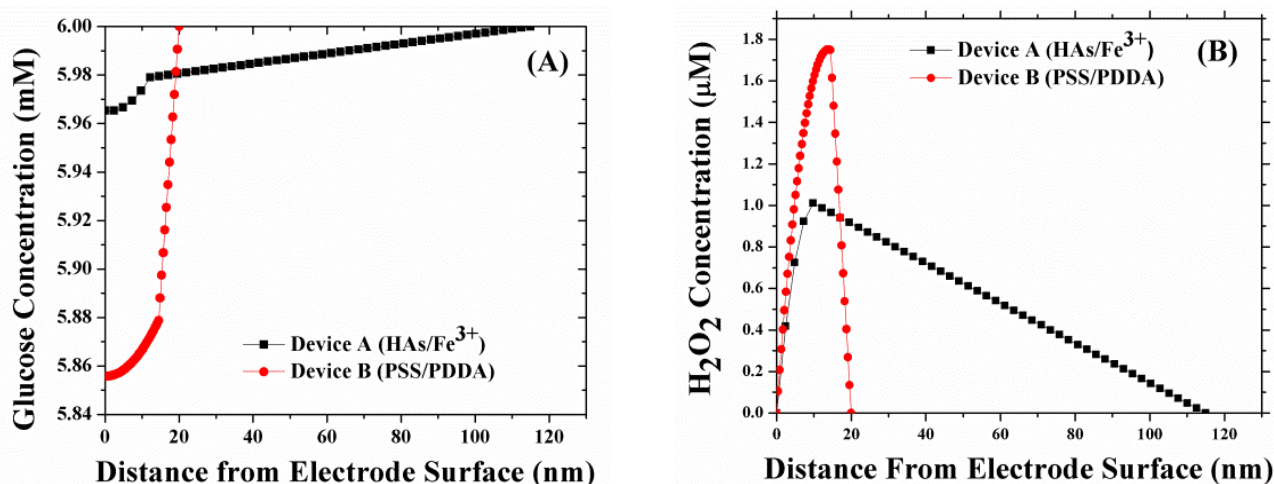

**Figure S2.** (A) Simulated glucose concentration profile in the multi-layer sensor system consisting of 25 nm GO<sub>x</sub>/PPD as the first layer, and different LBL membranes as the second layer (HAs/Fe<sup>3+</sup> and PSS/PDDA); (B) simulated H<sub>2</sub>O<sub>2</sub> concentration profile in the multi-layer sensor system consisting of 25 nm GO<sub>x</sub>/PPD as the first layer, and different LBL membranes as the second layer (HAs/Fe<sup>3+</sup> and PSS/PDDA).

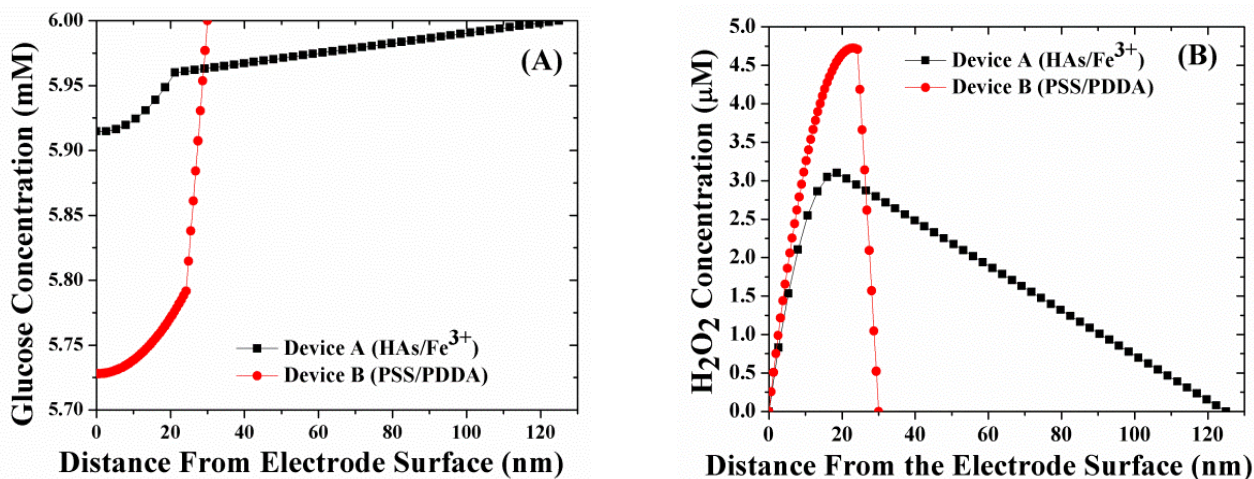

**Figure S3.** Simulated transient response of Devices A and B at (A) 2 mM, (B) 4 mM and (C) 20 mM glucose.

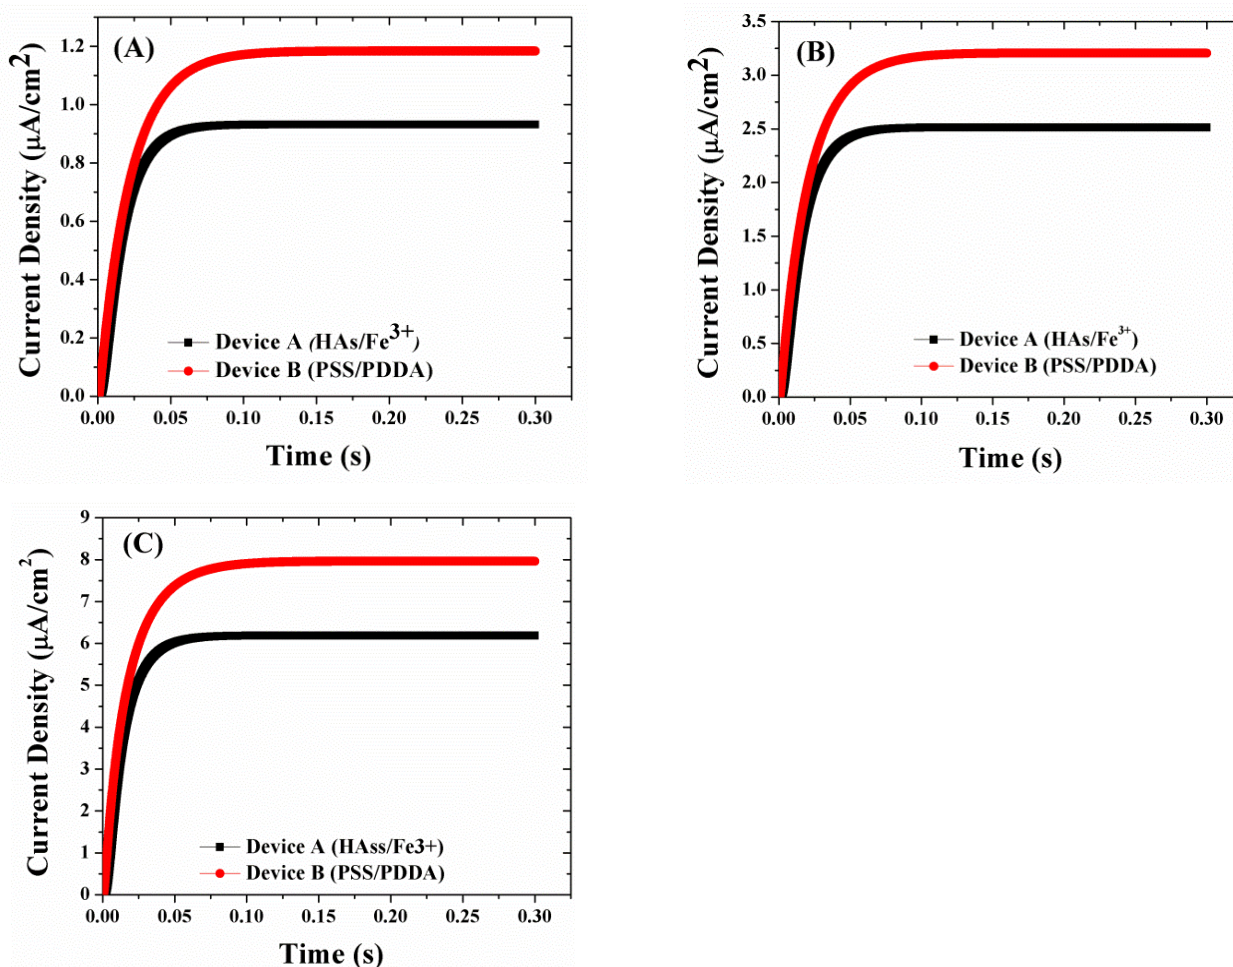

Supplement: Supplementary file 1 [file sensors-12-13402-s001.pdf]
